# Supplementary material
Source: PubMed Central journal article supplement (PMC3949138)
Supplement: NIHMS533068-supplement-Supp_Figure_S1.pdf [file NIHMS533068-supplement-Supp_Figure_S1.pdf]

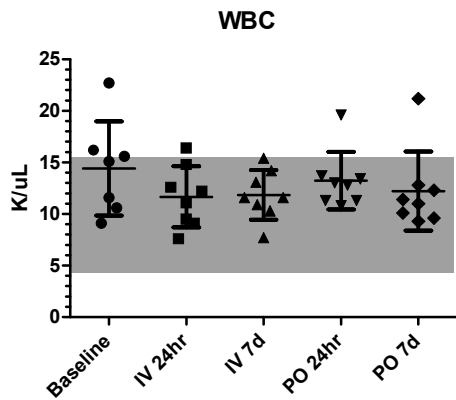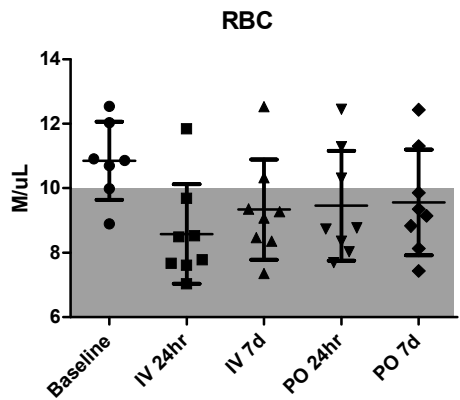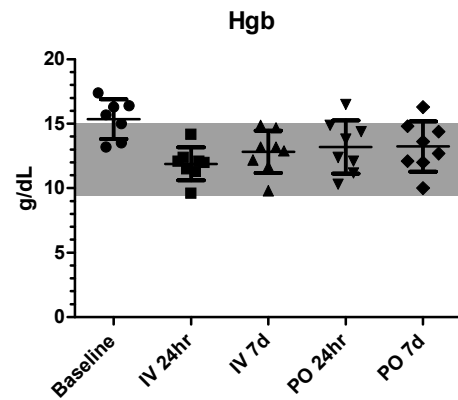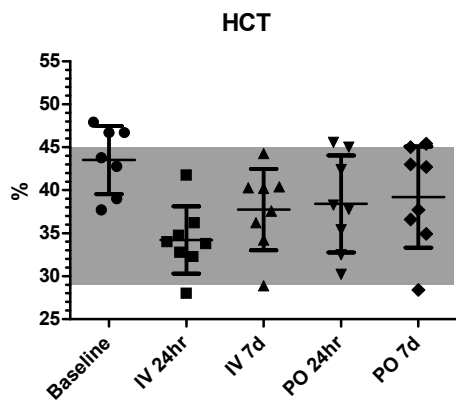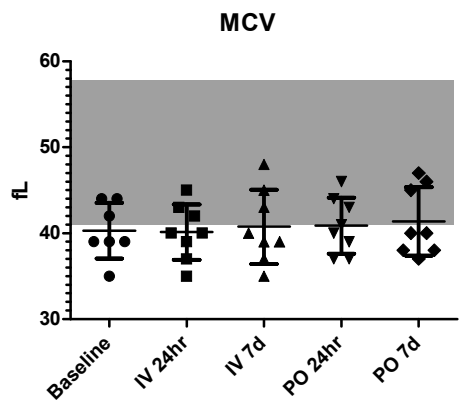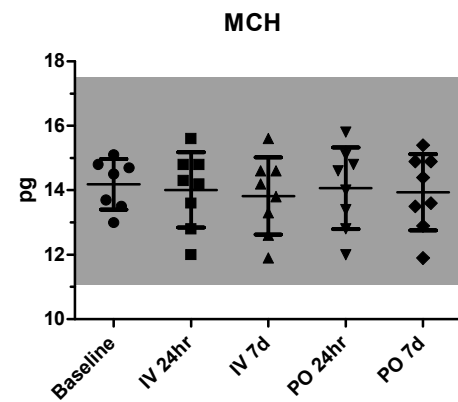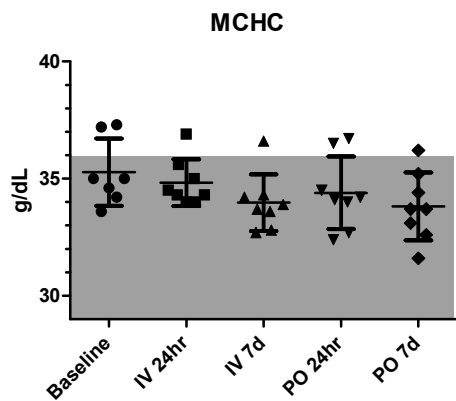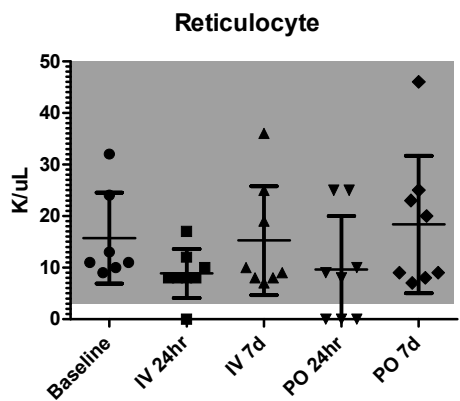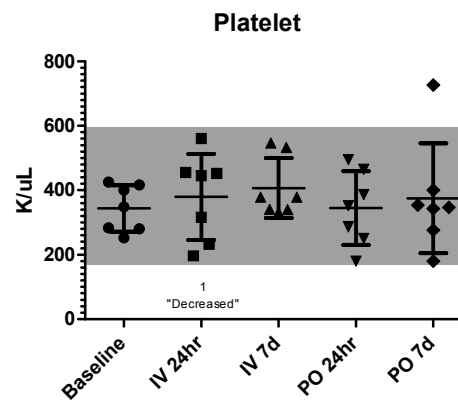

**Neutrophils**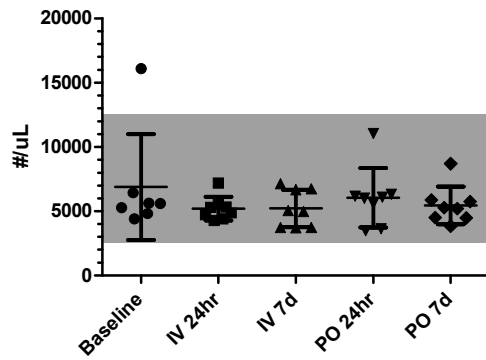**Lymphocytes**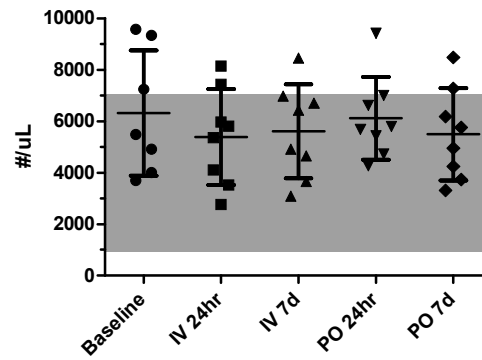**Monocytes**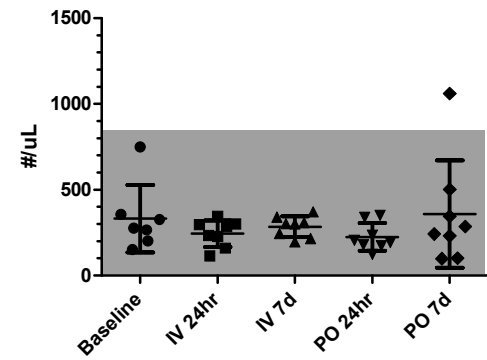**Eosinophils**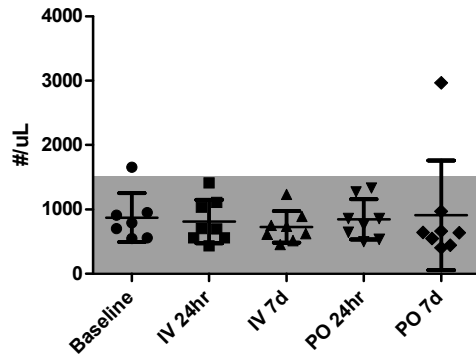**Basophils**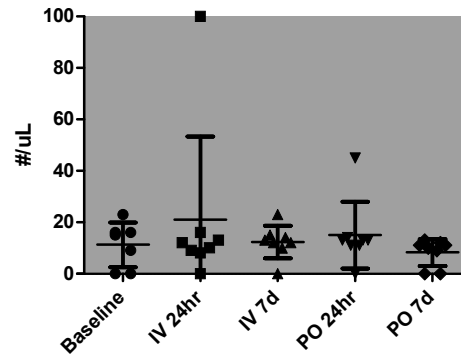

**ALP**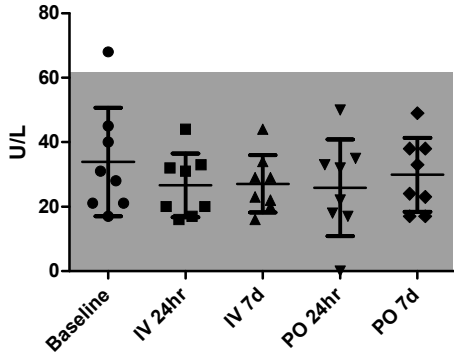**ALT**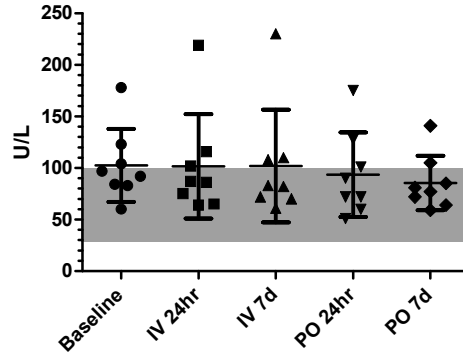**AST**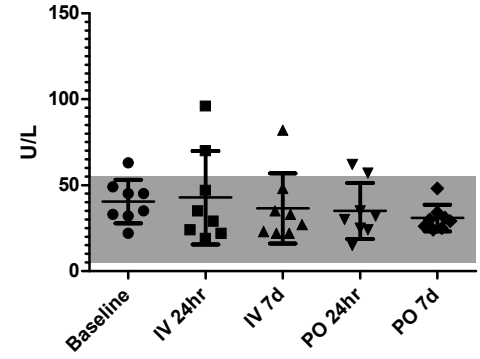**Albumin**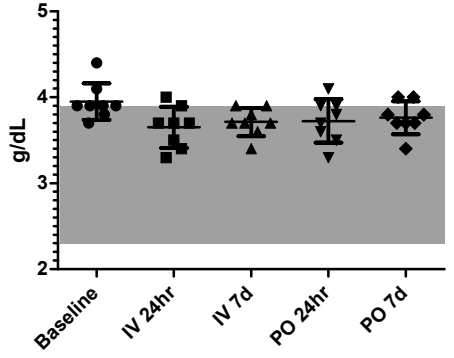**Total Protein**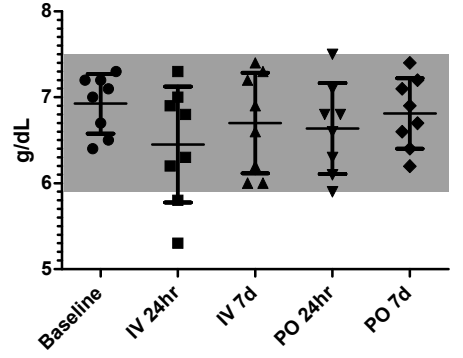**Globulin**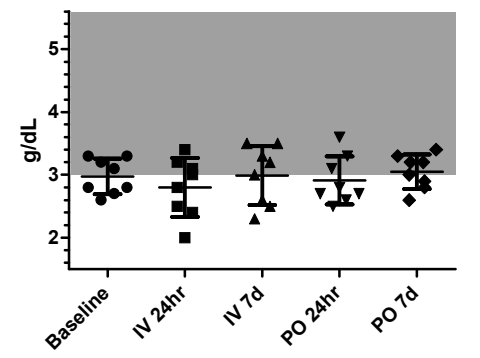**Total Bilirubin**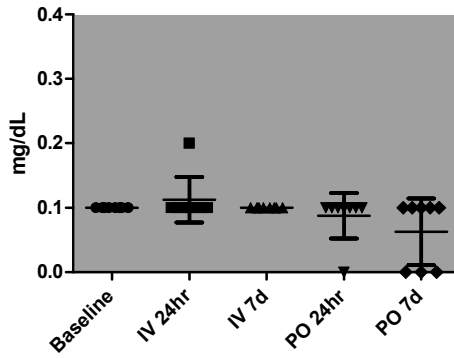**BUN**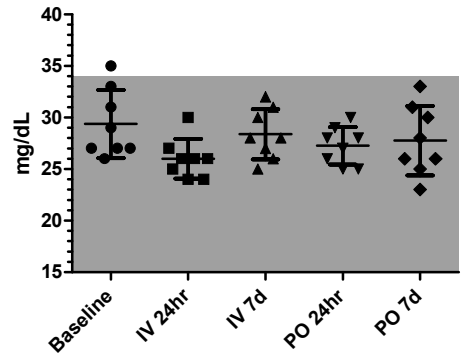**Creatinine**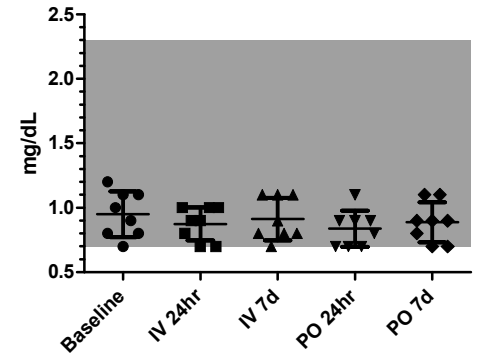

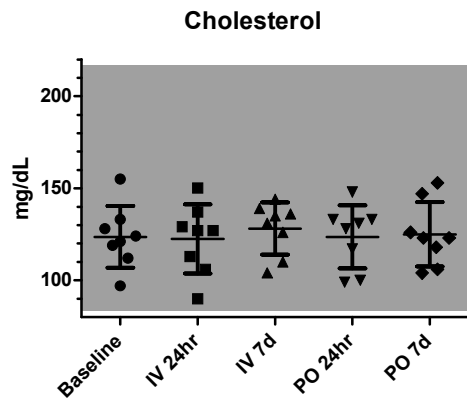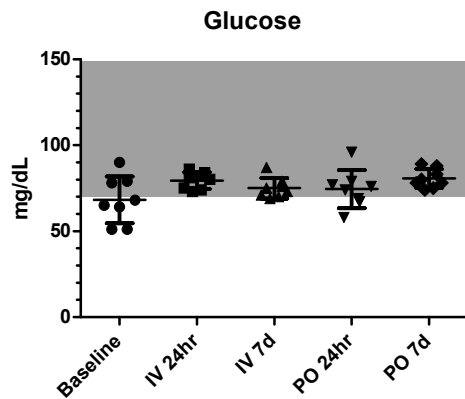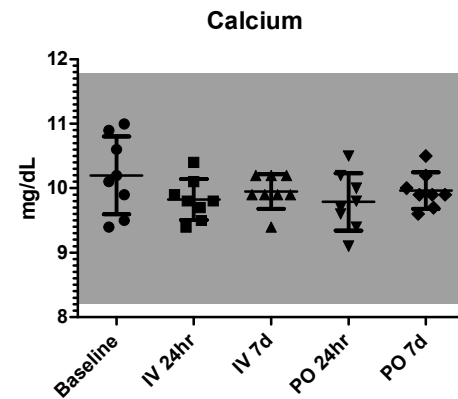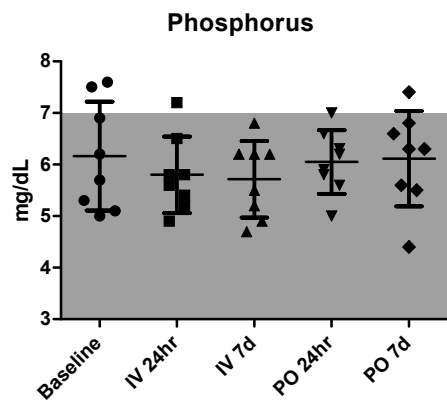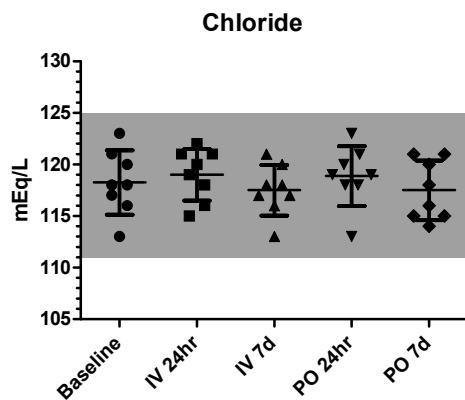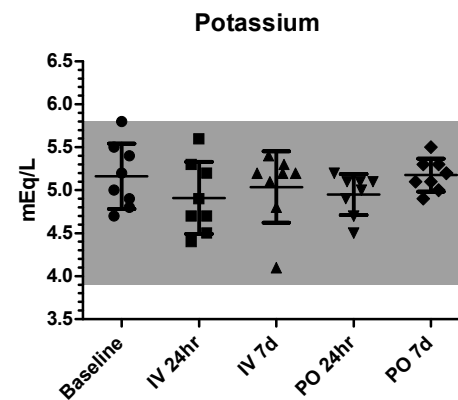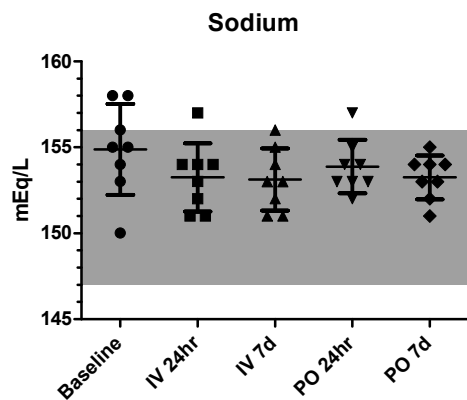

Supplementary Figure 1. Serum biochemistry and complete blood count (CBC) profiles for cats before (baseline) and 24 hours or 7 days after intravenous (IV) or oral (PO) suberoylanilide hydroxamic acid (SAHA) administration. Grey zones indicate the clinically normal reference range for each parameter.
